# Supplementary material for: Molecular Design and Mechanism Analysis of Phthalic Acid Ester Substitutes: Improved Biodegradability in Processes of Sewage Treatment and Soil Remediation
Source: MDPI journal article supplement (doi:10.3390/toxics10120783), 2022-12-13

# Molecular design and Mechanism Analysis of Phthalic Acid Ester Substitutes: Improved Biodegradability in Processes of Sewage Treatment And Soil Remediation

Shuhai Sun<sup>1,†</sup>, Qilin Zuo<sup>1,†</sup>, Meijin Du<sup>2,†</sup>, Yu Li<sup>2,\*</sup>

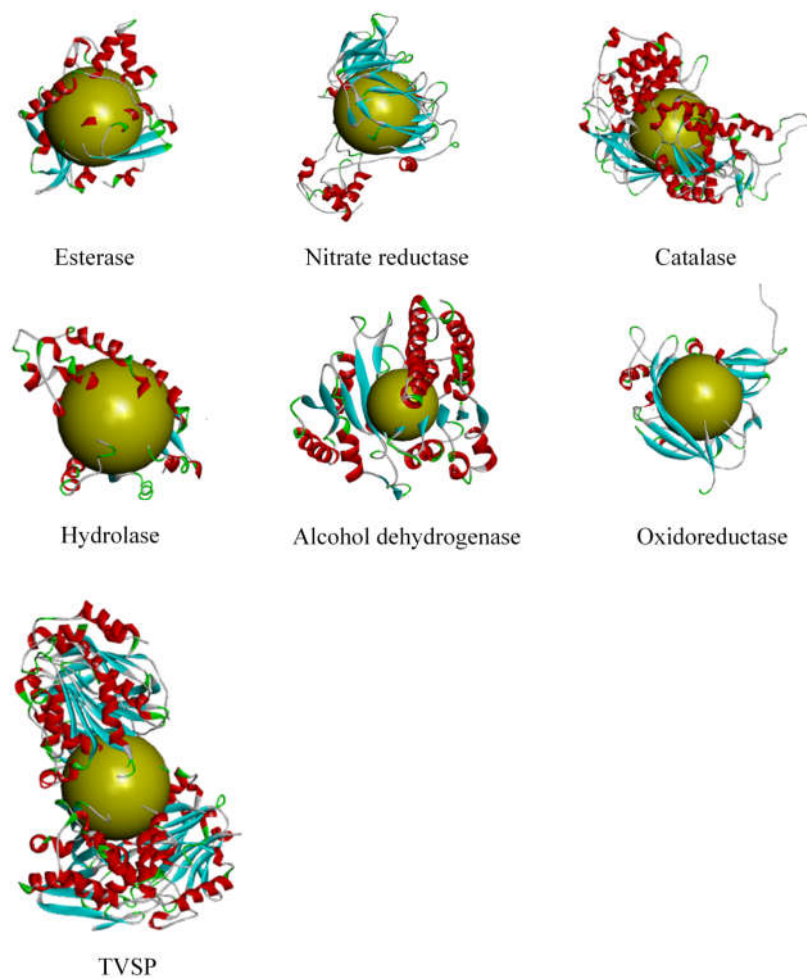

**Figure S1.** The docking site of proteins.

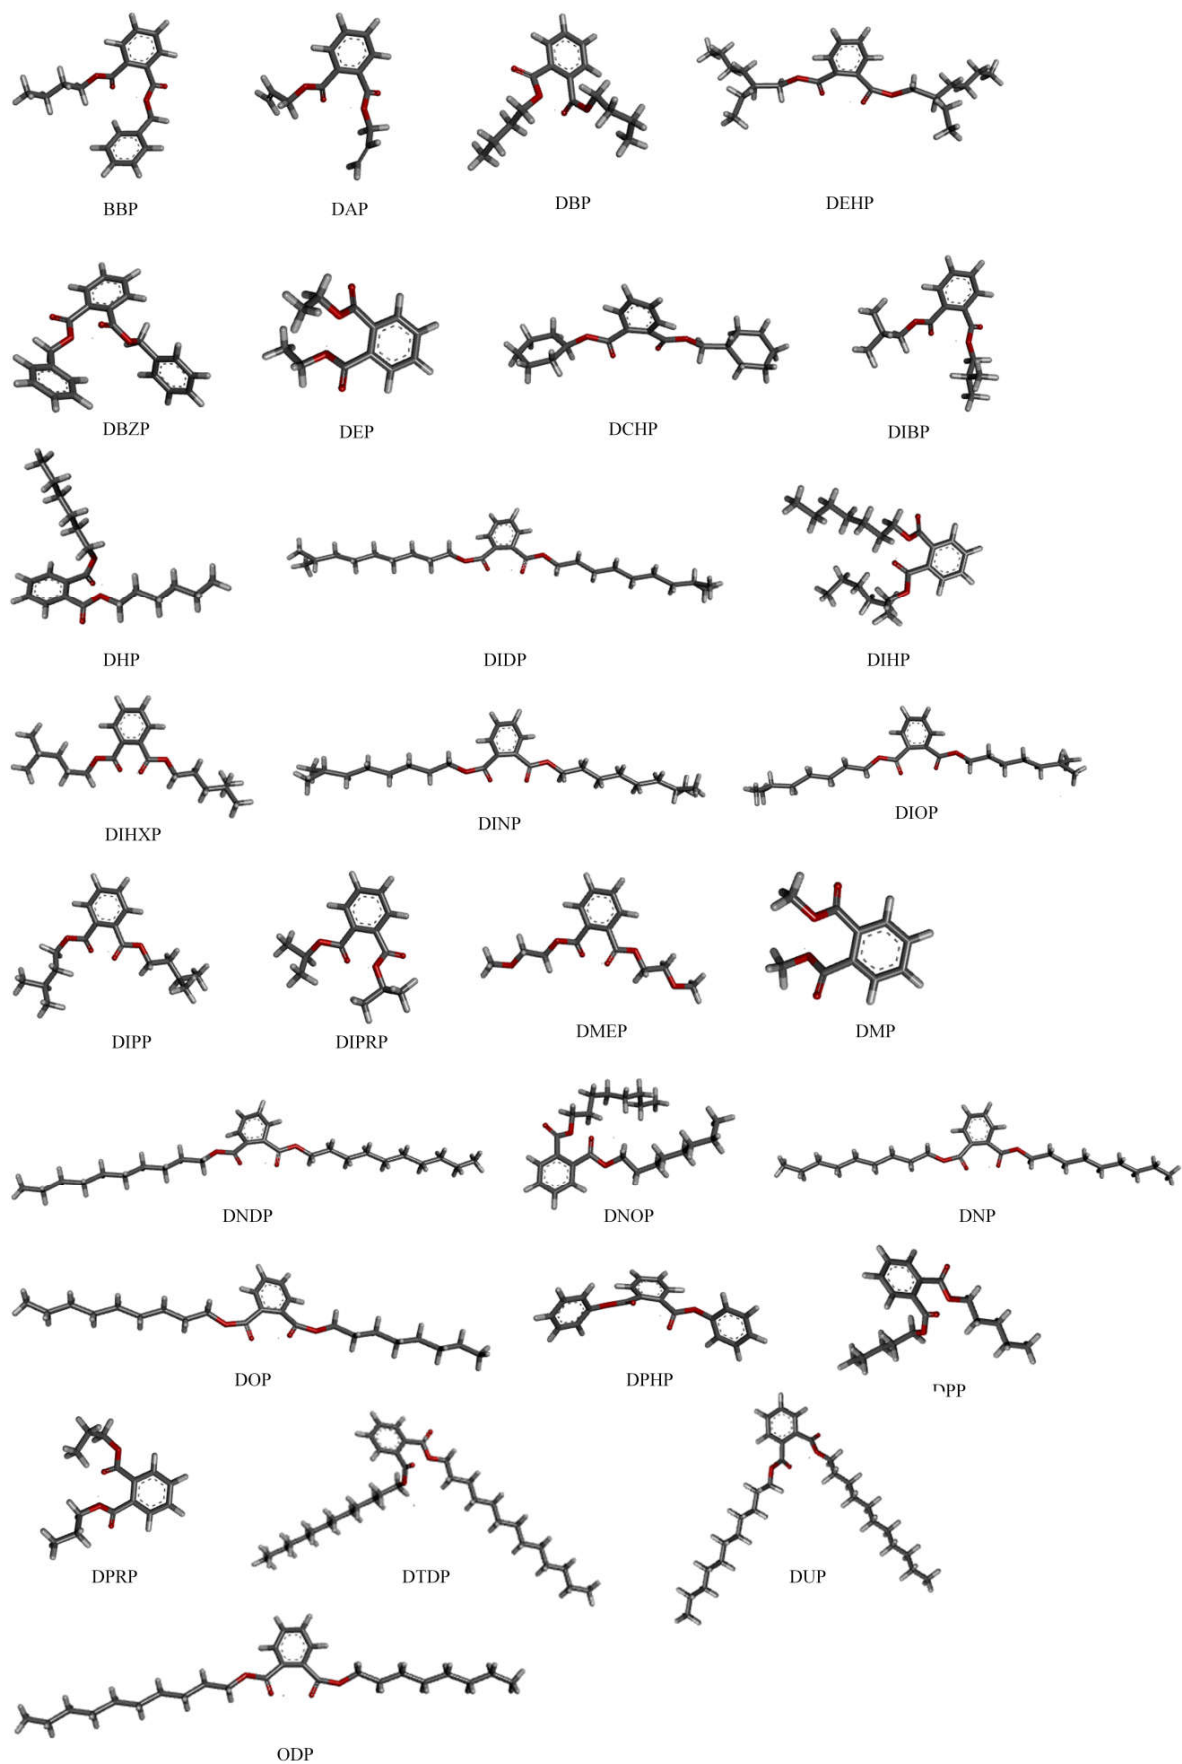

**Figure S2.** Molecular structure diagram of PAEs.

### Aerobic Bacteria:

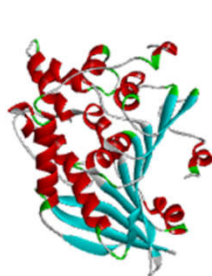

Esterase  
PDB ID: 7CUZ

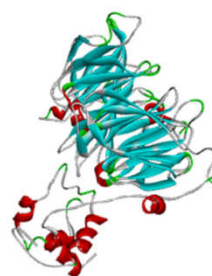

Nitrate reductase  
PDB ID: 1HZV

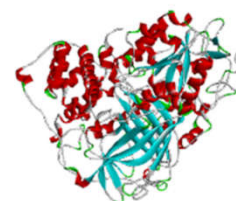

Catalase  
PDB ID: 1P80

### Anaerobic Bacteria:

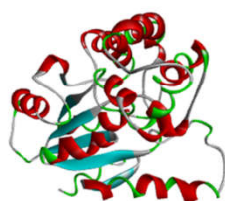

Hydrolase  
PDB ID: 2IOF

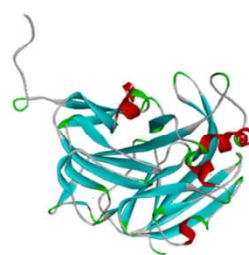

Oxidoreductase  
PDB ID: 1NIC

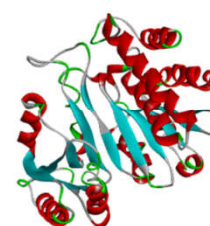

Alcohol dehydrogenase  
PDB ID: 3FMX

### Biodegradable Complex Proteins:

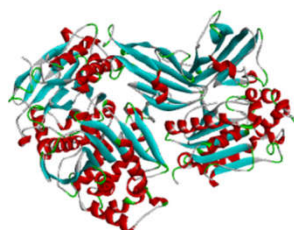

Soil composite degradation enzyme

**Figure S3.** The structure of proteins.

**Table S1.** Molecular structure of DBP and DEHP substitutes.

| Molecular | Chemical structure diagram | Molecular | Chemical structure diagram |
|-----------|----------------------------|-----------|----------------------------|
| DBP-1     |                            | DEHP-1    |                            |

DBP-2

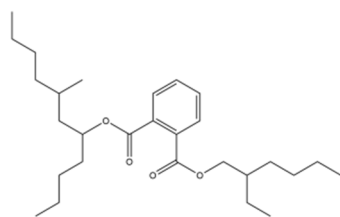

DEHP-2

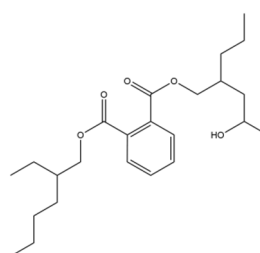

DBP-3

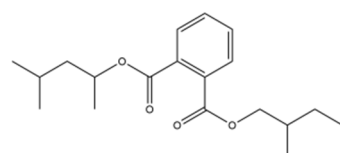

DEHP-3

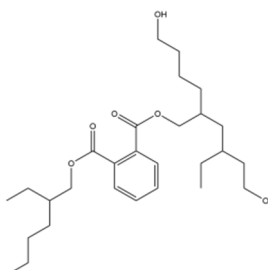

DBP-4

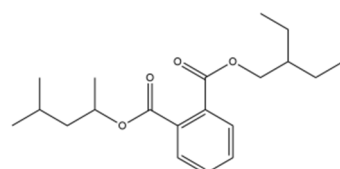

DEHP-4

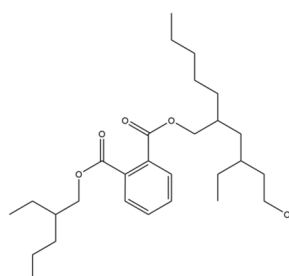

DBP-5

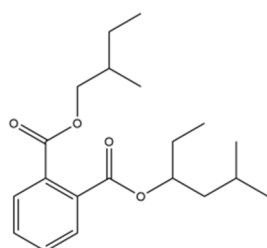

DEHP-5

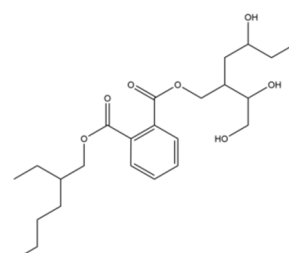

DBP-6

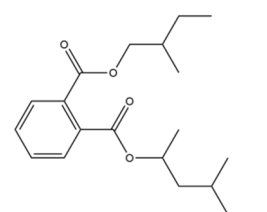

DEHP-6

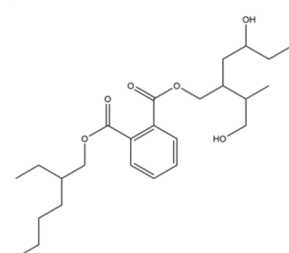

DBP-7

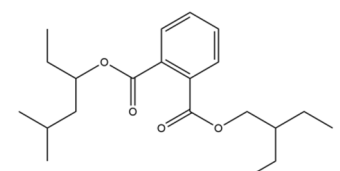

DEHP-7

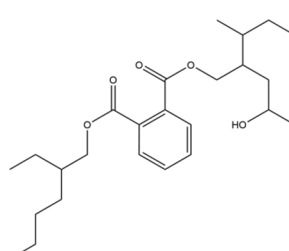

DBP-8

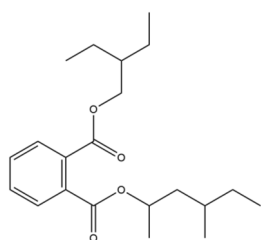

DEHP-8

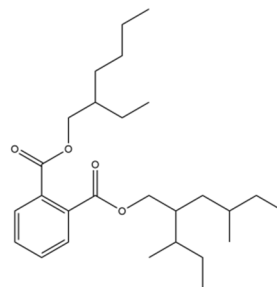

DBP-9

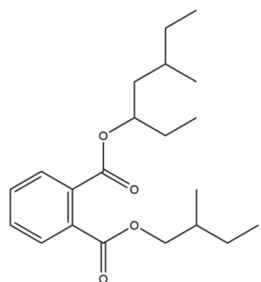

DEHP-9

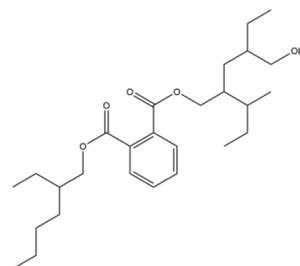

DBP-10

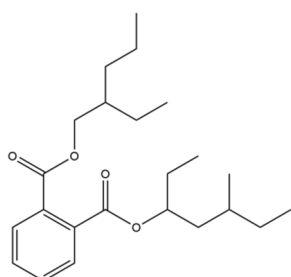

DEHP-10

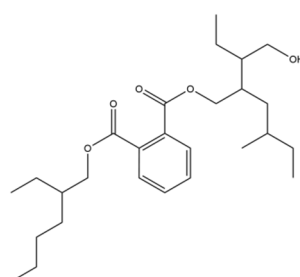

DBP-11

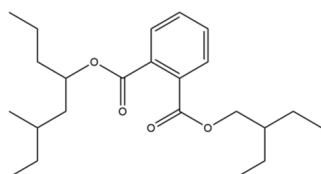

DEHP-11

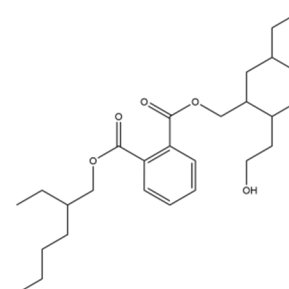

DBP-12

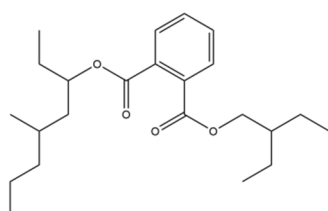

DEHP-12

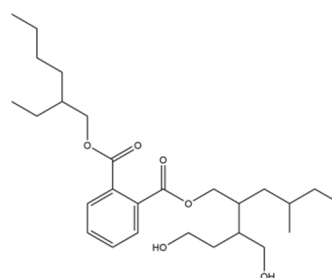

DBP-13

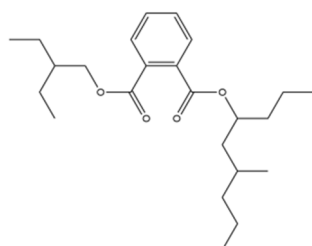

DEHP-13

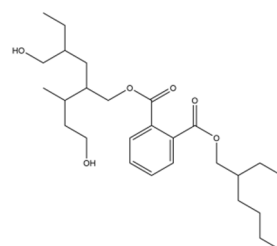

DBP-14

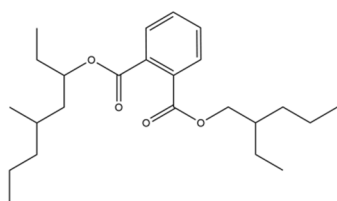

DBP-15

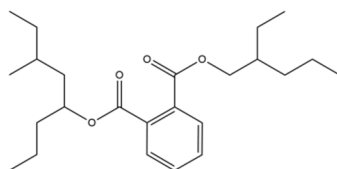

DBP-16

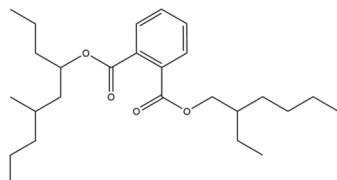

DBP-17

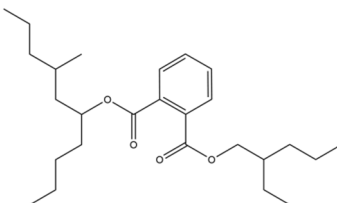

DBP-18

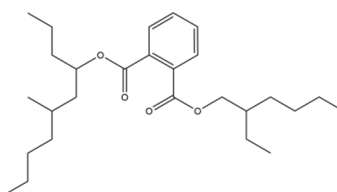

DBP-19

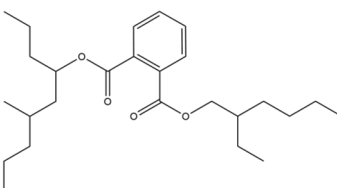

DEHP-14

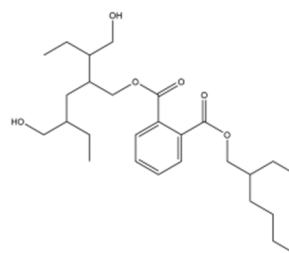

DEHP-15

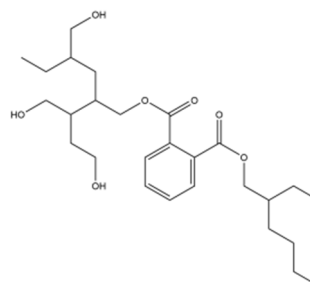

DEHP-16

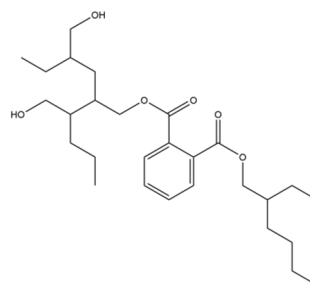

DEHP-17

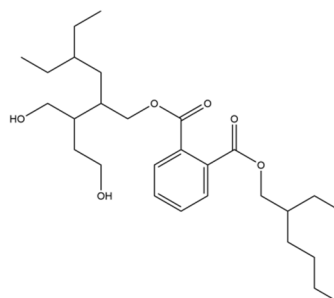

DEHP-18

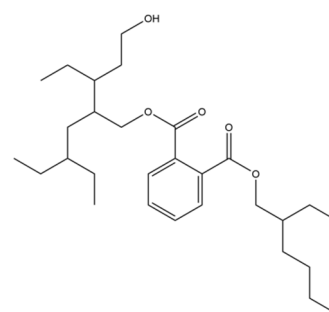

DEHP-19

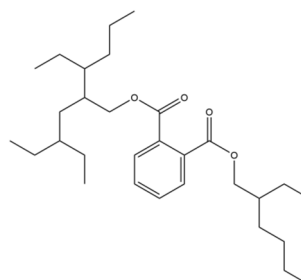

Supplement: s1 [file s1]
